# Supplementary material for: An enhanced isothermal amplification assay for viral detection
Source: PubMed Central journal article supplement (PMC7679446; doi:10.1038/s41467-020-19258-y), 2020-11-20
Supplement: 41467_2020_19258_MOESM1_ESM.pdf [file 41467_2020_19258_MOESM1_ESM.pdf]

**Title:** Supplementary Data 1.

**Description:** Analysis of primer dimers in RT-RPA reactions.

**Title:** Supplementary Data 2

**Description:** Bioinformatic analysis of the number of mismatches between eRPA assay primers and known variants of SARS-CoV-2. Bioinformatic analysis of the number of mismatches between eRPA assay primers and other coronaviruses.

**Title:** Supplementary Data 3.

**Description:** Data for all patient sample RT-qPCR and eRPA assays performed in this study
